# Supplementary material for: The effects of nonmetal dopants on the electronic, optical, and catalytic performances of monolayer WSe2 by a first-principles study
Source: Royal Society of Chemistry journal article supplement (doi:10.1039/c6ra15697e), 2016-01-01
Supplement: c6ra15697e1.pdf [file c6ra15697e1.pdf]

## Supplementary Information

The effects of nonmetal dopants on the electronic, optical and catalytic performances of monolayer WSe<sub>2</sub> by first-principles study

S. Lu<sup>1</sup>, C. Li<sup>1\*</sup>, Y. F. Zhao<sup>1</sup>, H. H. Li<sup>1</sup>, Y. Y. Gong<sup>1</sup>, L. Y. Niu<sup>1</sup>, X. J. Liu<sup>1</sup> and T. Wang<sup>2</sup>

<sup>1</sup> Institute of Coordination Bond Metrology and Engineering, College of Materials Science and Engineering, China Jiliang University, Hangzhou 310018, China

<sup>2</sup> College of Electrical Engineering, Zhejiang University, Hangzhou 310027, China

Email: canli1983@gmail.com

Fig. 1S The schematic diagram of specimens including and excluding the dopant, (a) substituted specimen, (b) interstitial specimen and (c) specimen excluding a dopant with a vacancy

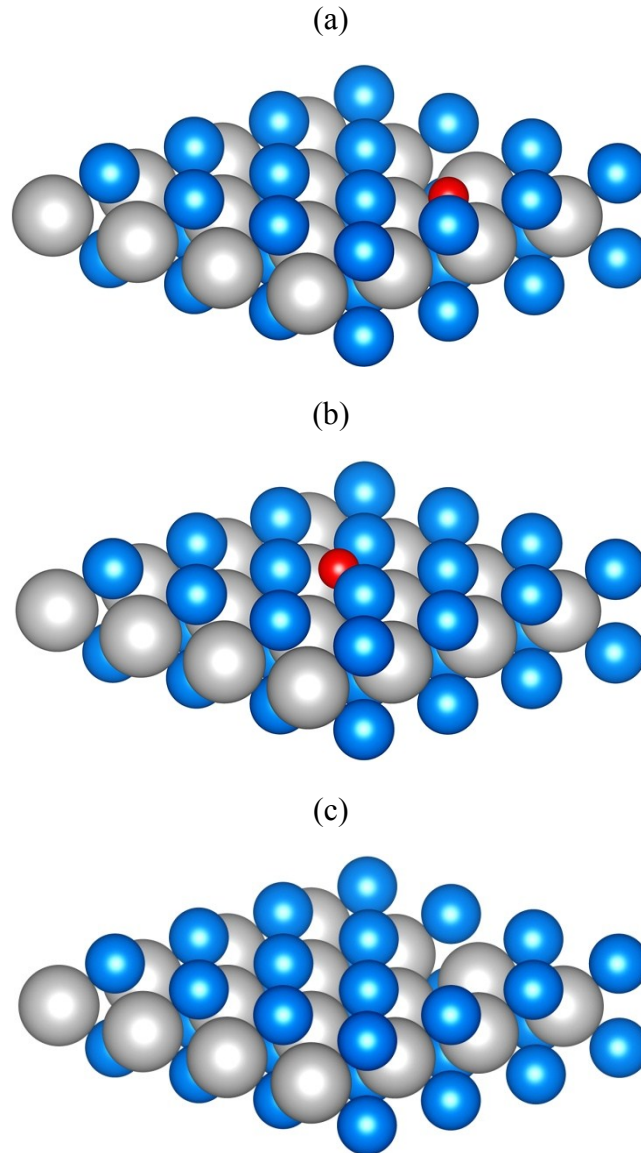

Fig. 2S The configurations of substituted WSe<sub>2</sub> at 0, 1, 2, 3, 4 and 5 ps.

(a) H doped

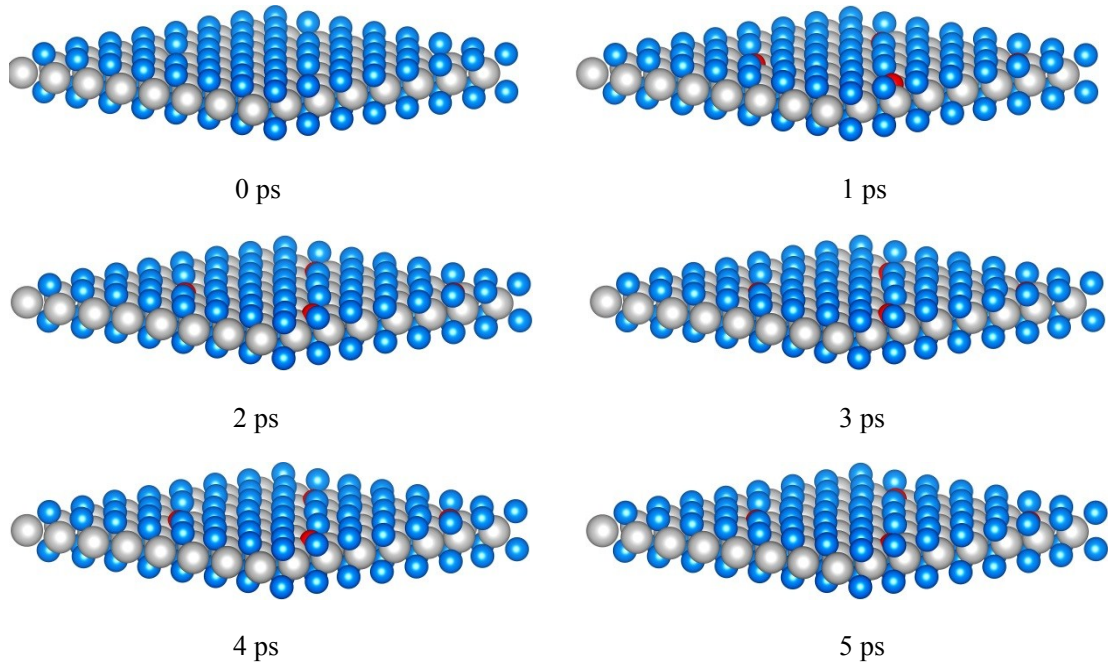

(b) B doped

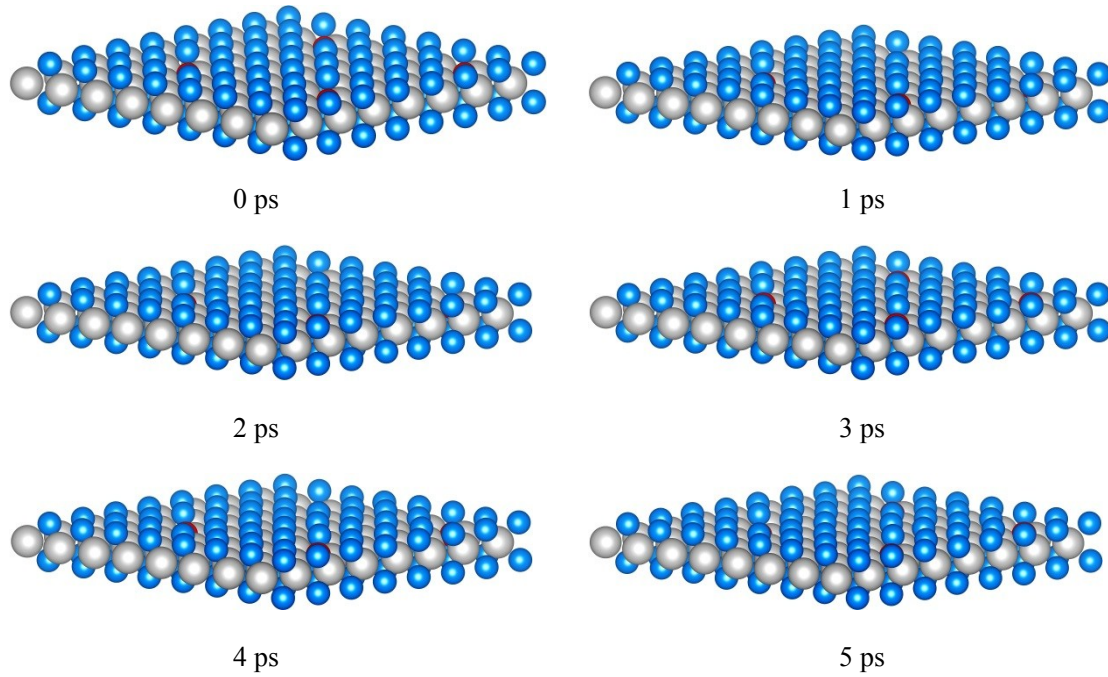

(c) C doped

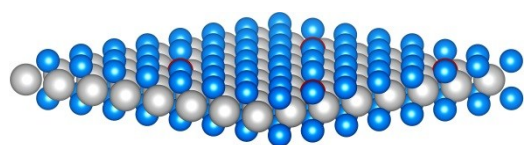

0 ps

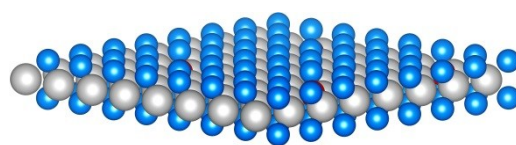

1 ps

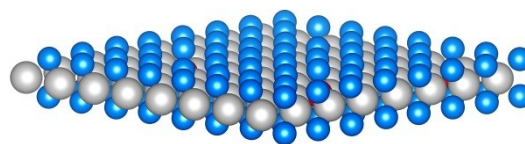

2 ps

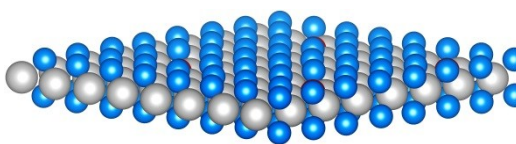

3 ps

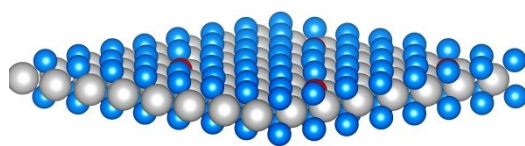

4 ps

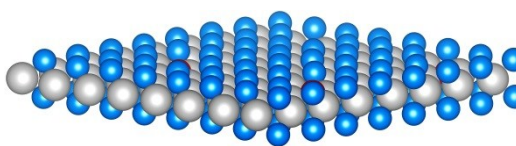

5 ps

(d) N doped

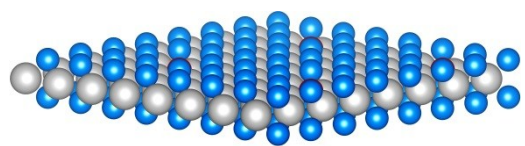

0 ps

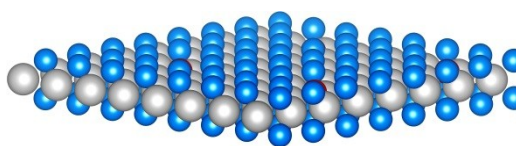

1 ps

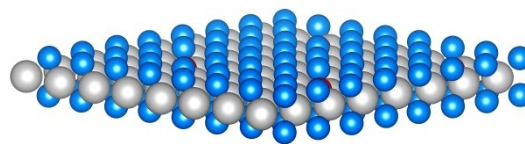

2 ps

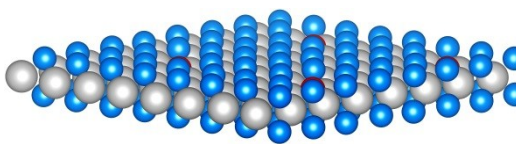

3 ps

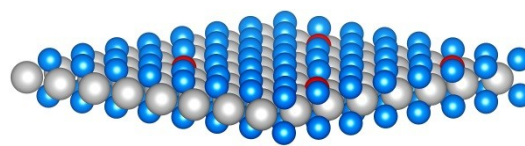

4 ps

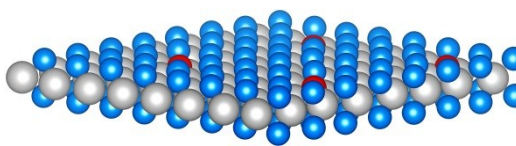

5 ps



(e) O doped

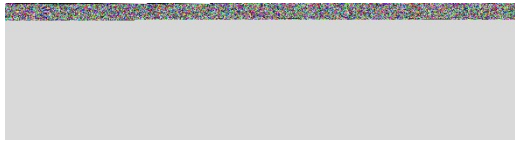

0 ps

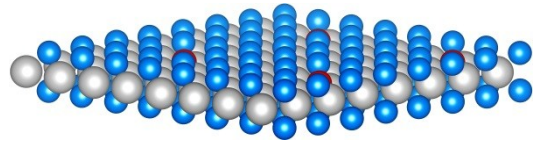

1 ps

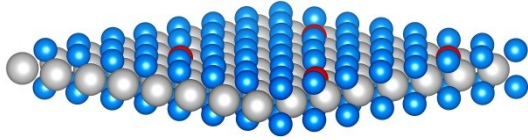

2 ps

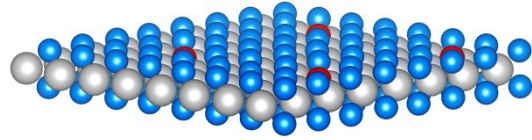

3 ps

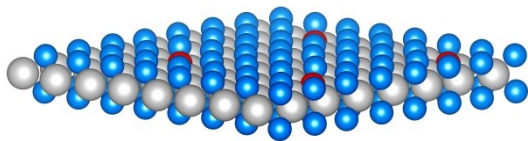

4 ps

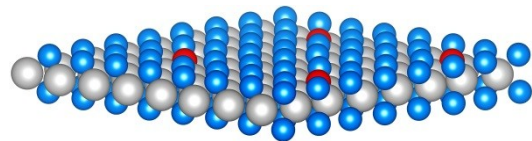

5 ps

(f) F doped

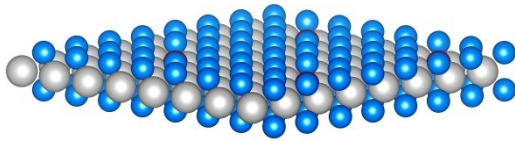

0 ps

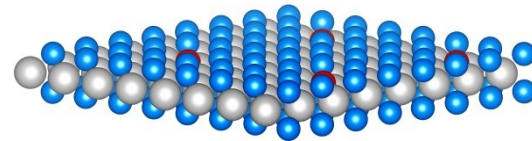

1 ps

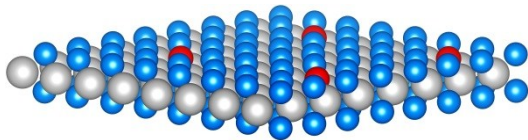

2 ps

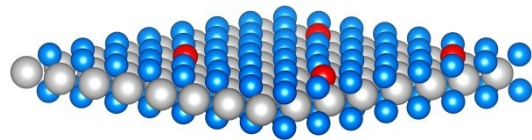

3 ps

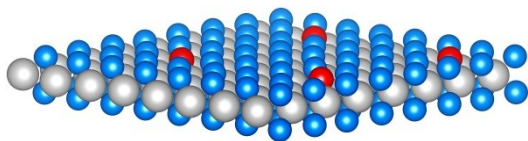

4 ps

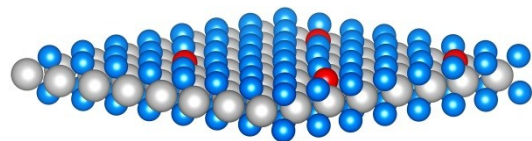

5 ps

(g) Si doped

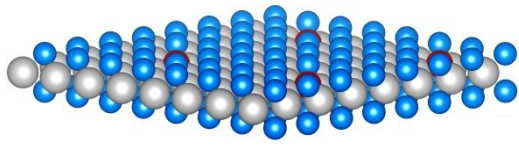

0 ps

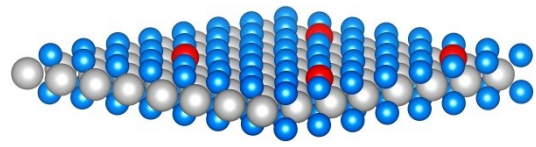

1 ps

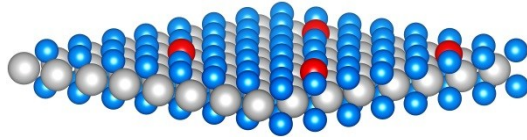

2 ps

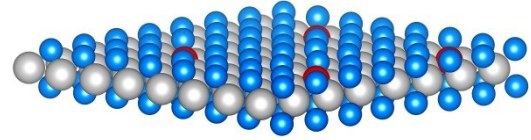

3 ps

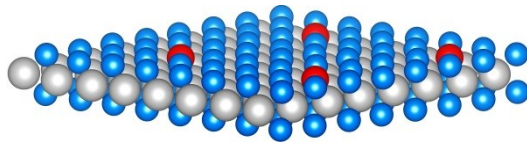

4 ps

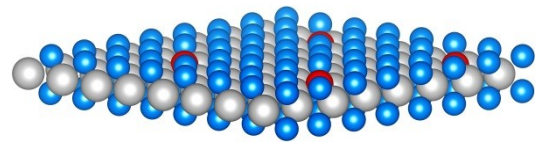

5 ps

(h) P doped

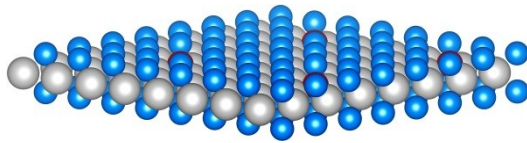

0 ps

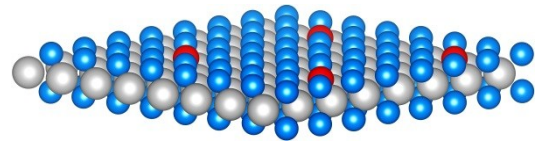

1 ps

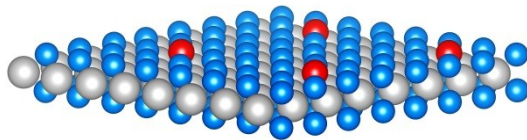

2 ps

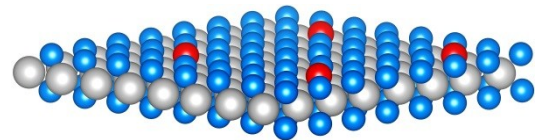

3 ps

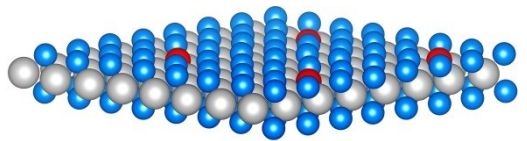

4 ps

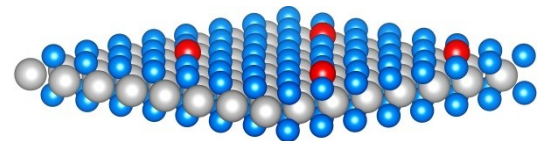

5 ps

(i) S doped

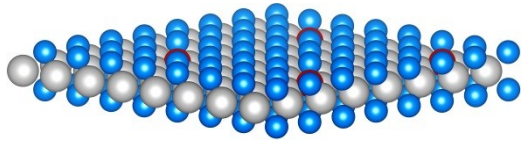

0 ps

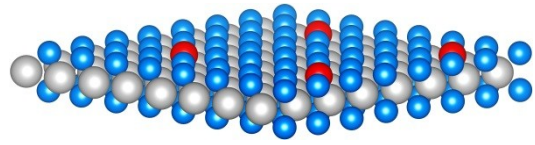

1 ps

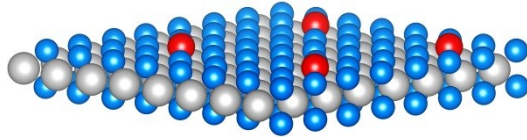

2 ps

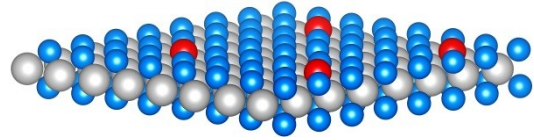

3 ps

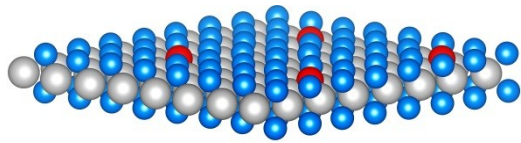

4 ps

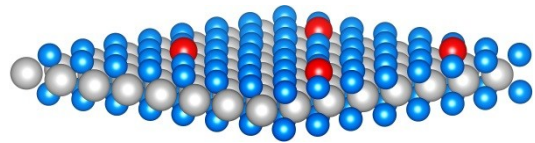

5 ps

(j) Cl doped

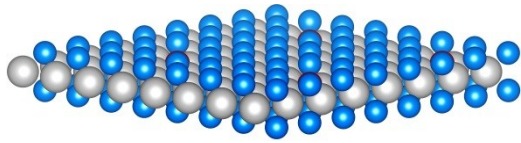

0 ps

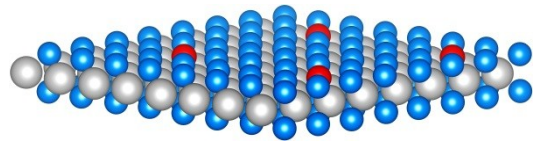

1 ps

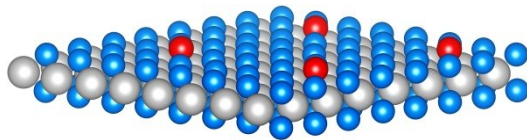

2 ps

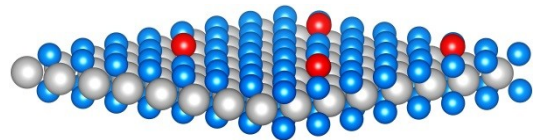

3 ps

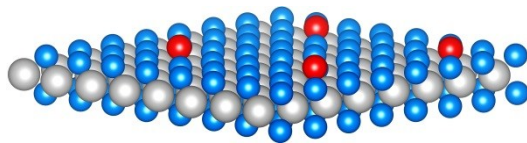

4 ps

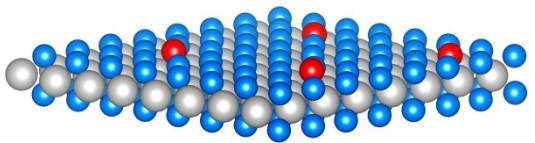

5 ps



(k) As doped

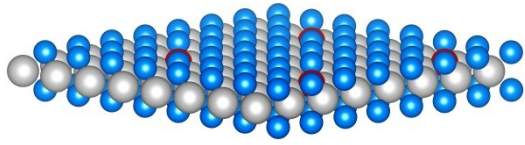

0 ps

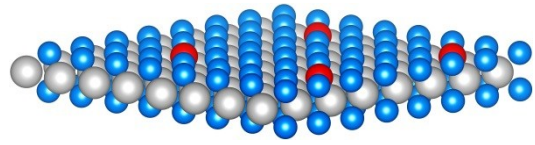

1 ps

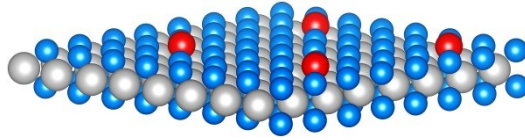

2 ps

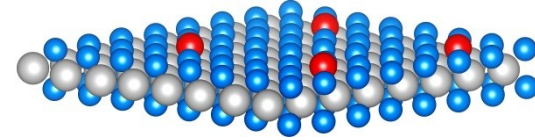

3 ps

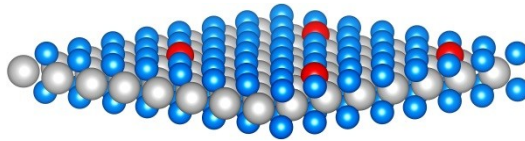

4 ps

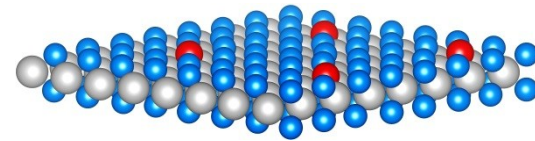

5 ps

(l) Br doped

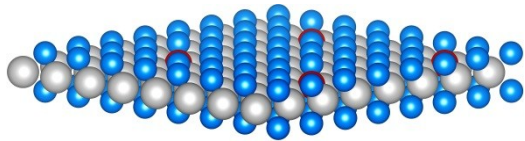

0 ps

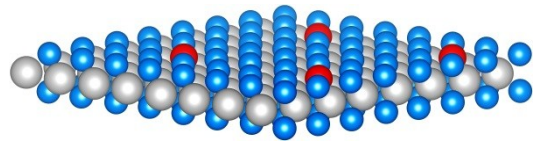

1 ps

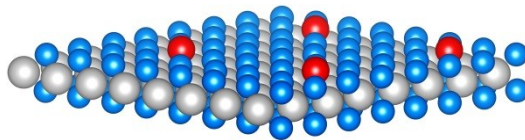

2 ps

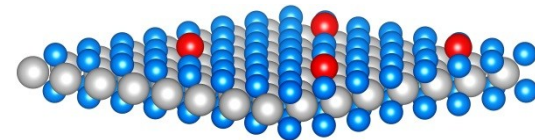

3 ps

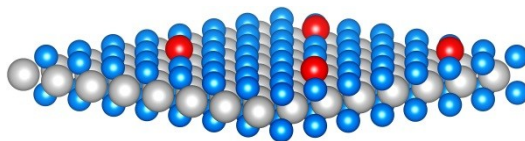

4 ps

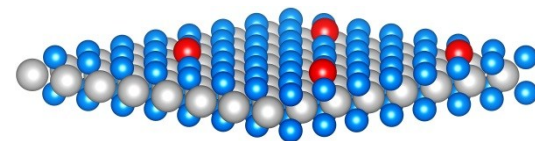

5 ps



(m) Te doped

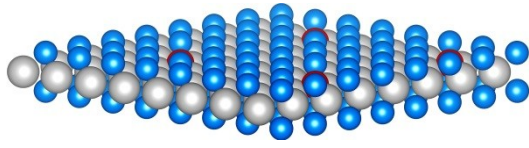

0 ps

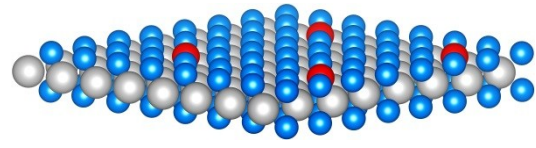

1 ps

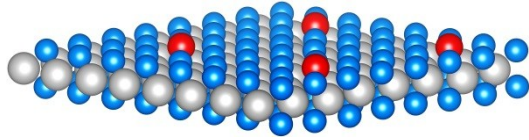

2 ps

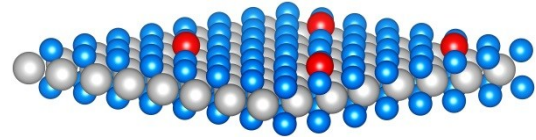

3 ps

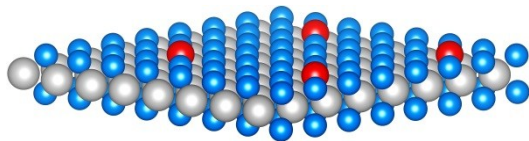

4 ps

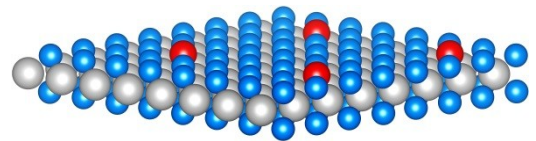

5 ps

(n) I doped

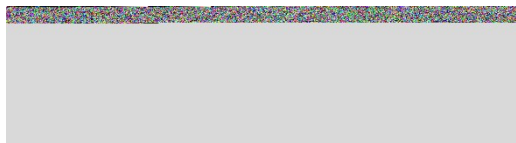

0 ps

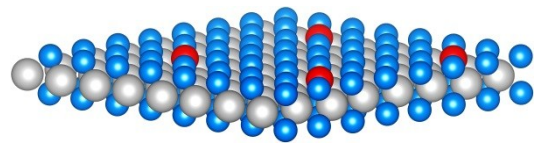

1 ps

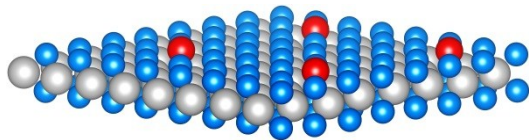

2 ps

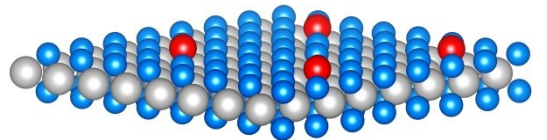

3 ps

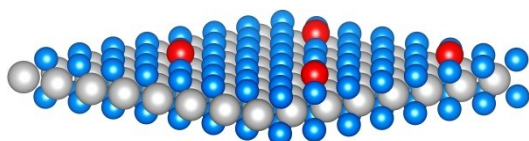

4 ps

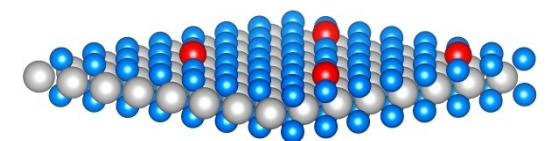

5 ps

Fig. 3S The configurations of interstitial WSe<sub>2</sub> at 0, 1, 2, 3, 4 and 5 ps.

(a) H doped

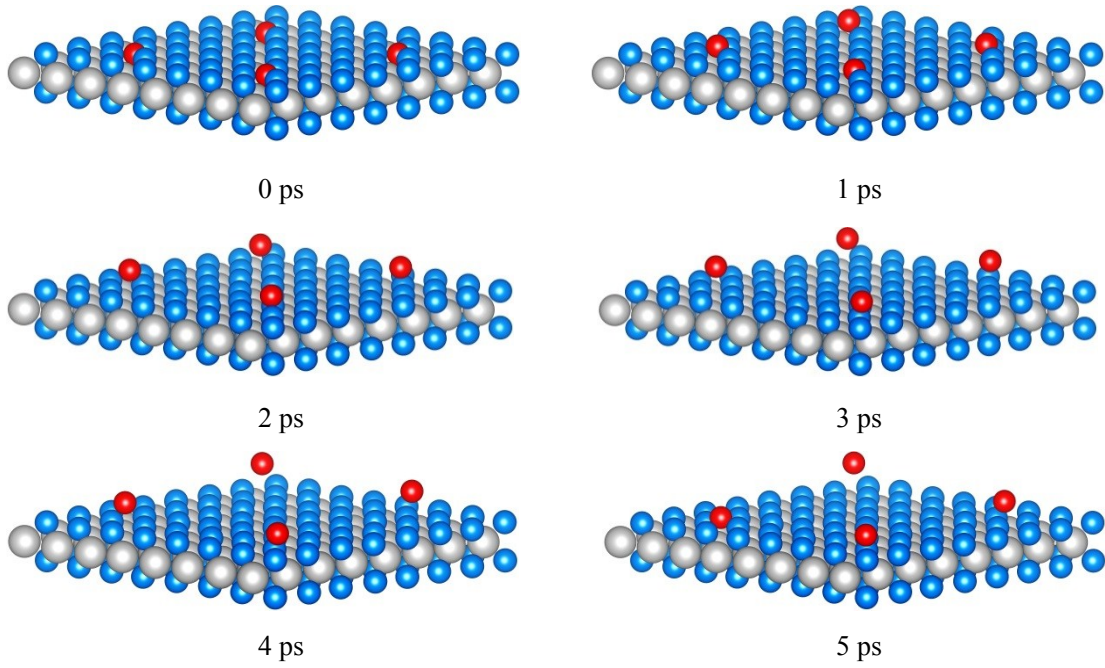

(b) B doped

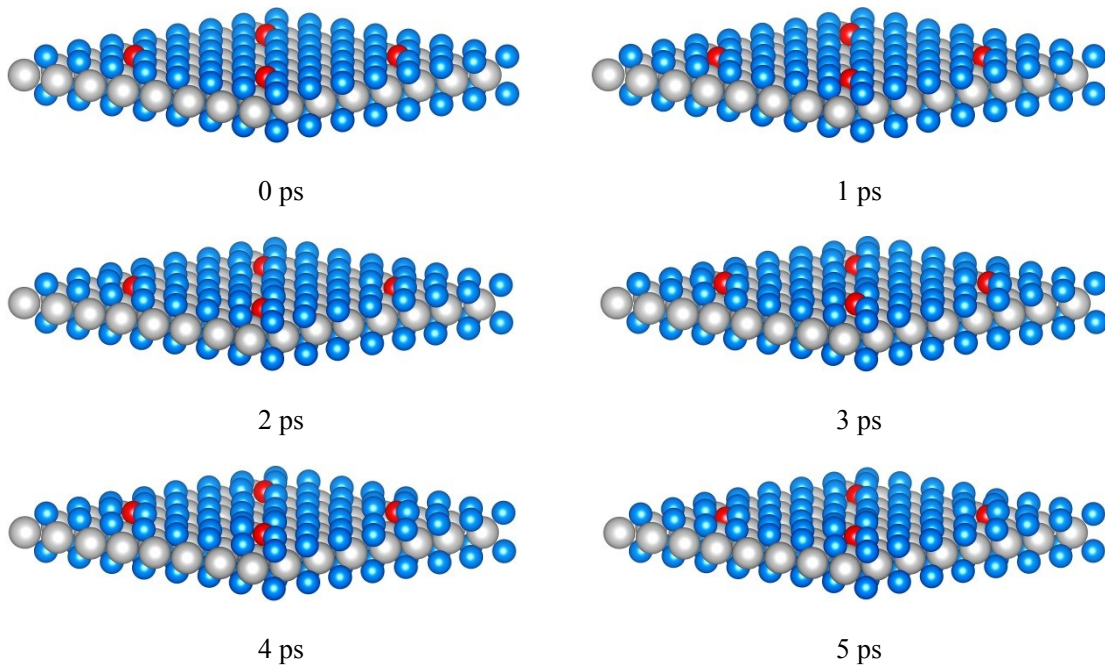

(c) C doped

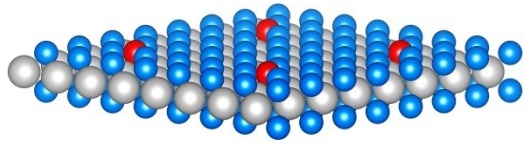

0 ps

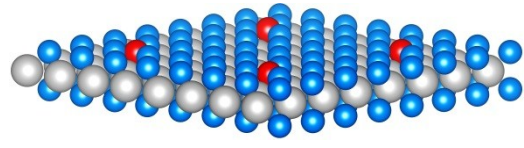

1 ps

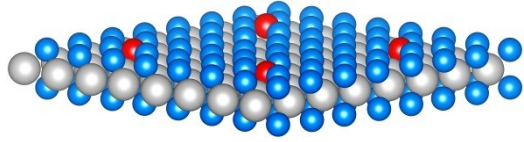

2 ps

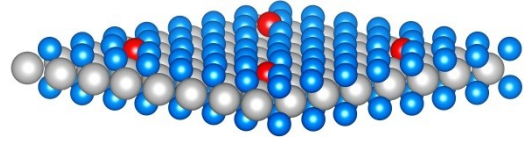

3 ps

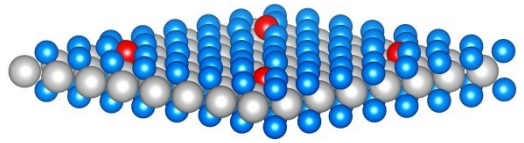

4 ps

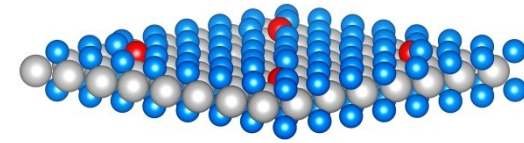

5 ps

(d) N doped

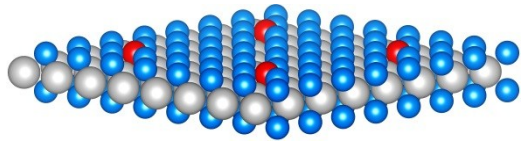

0 ps

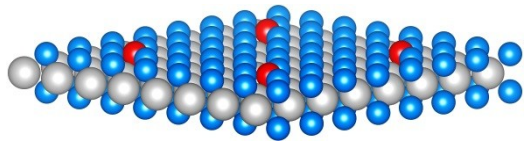

1 ps

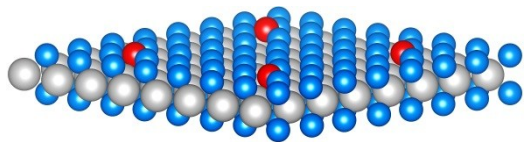

2 ps

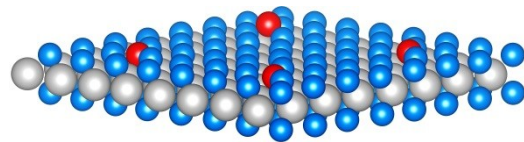

3 ps

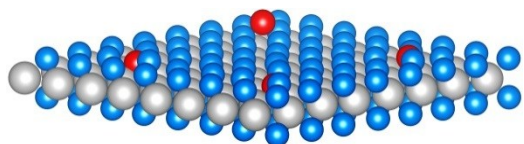

4 ps

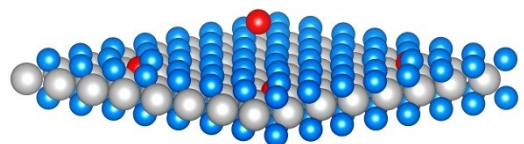

5 ps



(e) O doped

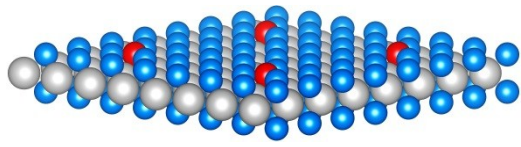

0 ps

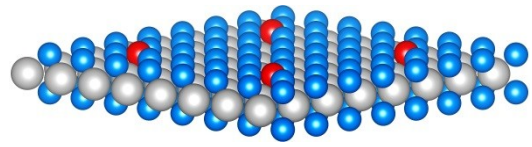

1 ps

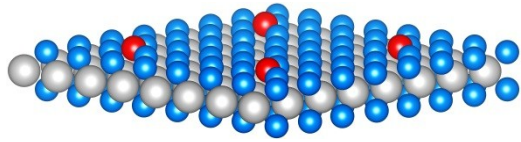

2 ps

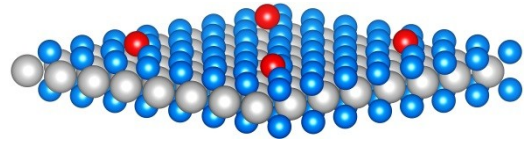

3 ps

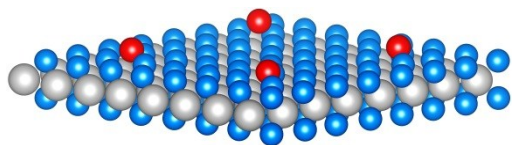

4 ps

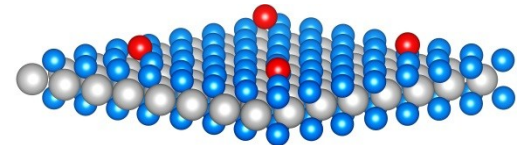

5 ps

(f) F doped

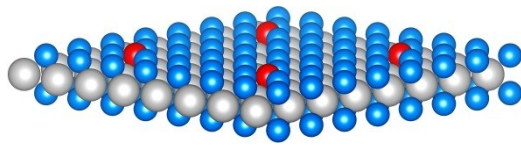

0 ps

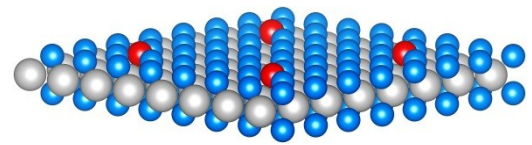

1 ps

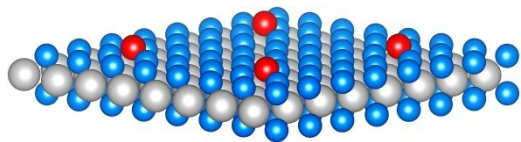

2 ps

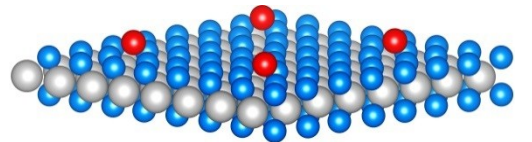

3 ps

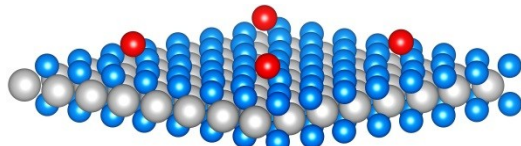

4 ps

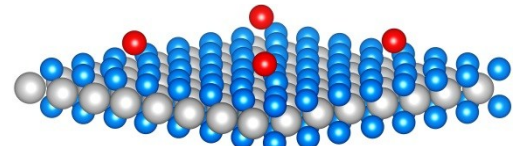

5 ps

(g) Si doped

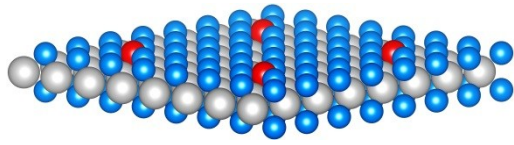

0 ps

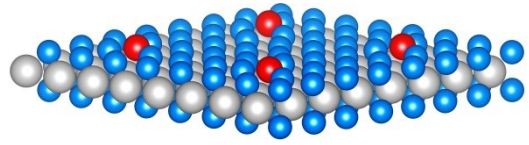

1 ps

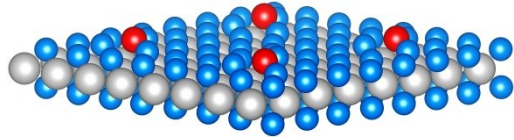

2 ps

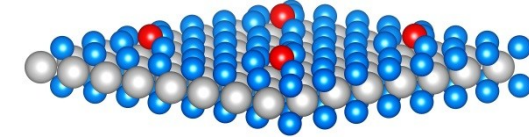

3 ps

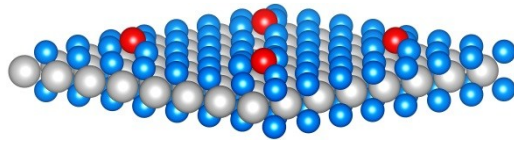

4 ps

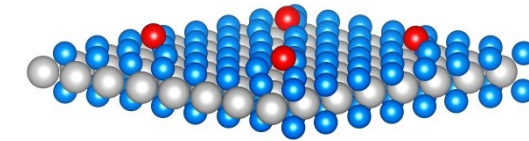

5 ps

(h) P doped

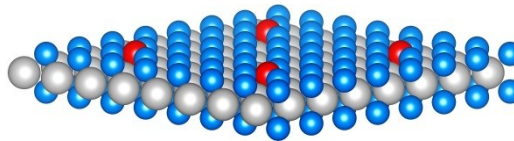

0 ps

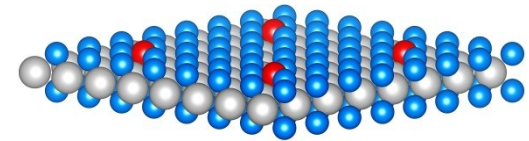

1 ps

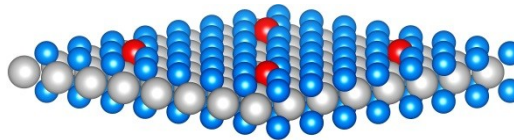

2 ps

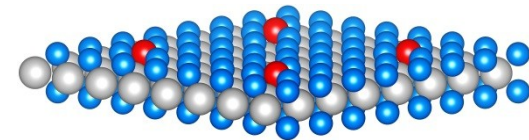

3 ps

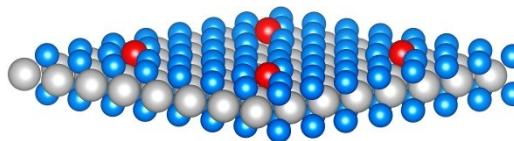

4 ps

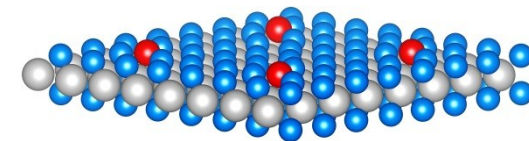

5 ps

(i) S doped

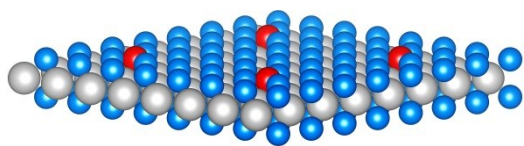

0 ps

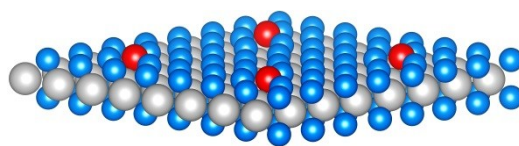

1 ps

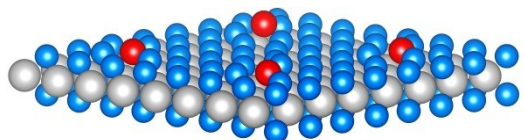

2 ps

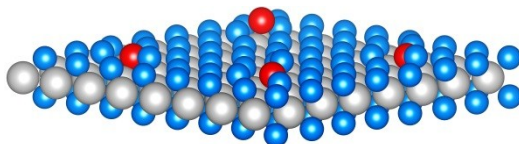

3 ps

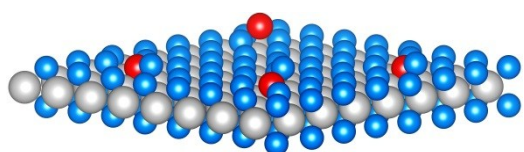

4 ps

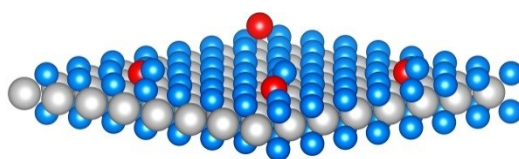

5 ps

(j) Cl doped

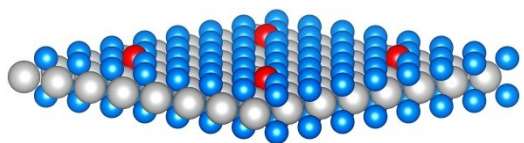

0 ps

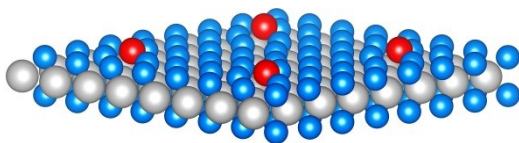

1 ps

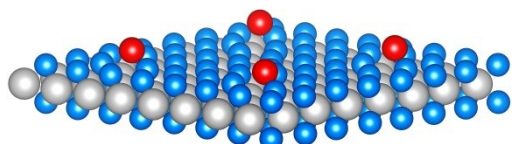

2 ps

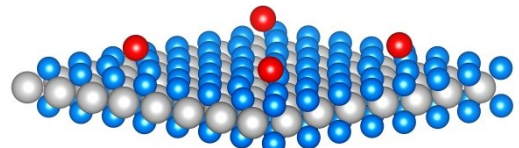

3 ps

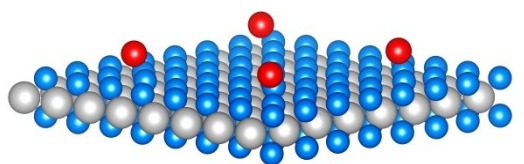

4 ps

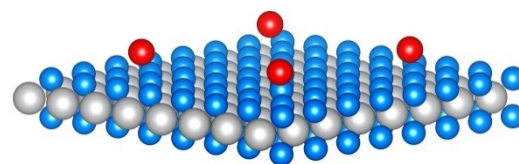

5 ps



(k) As doped

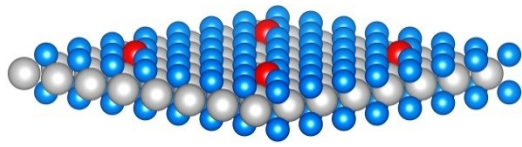

0 ps

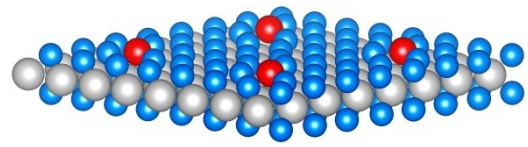

1 ps

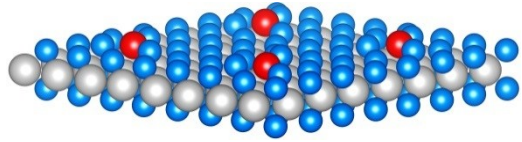

2 ps

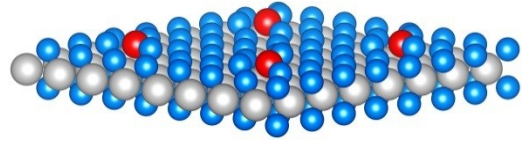

3 ps

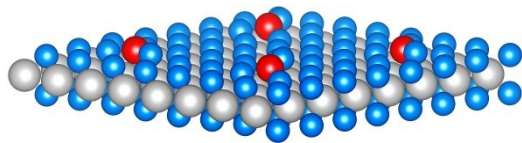

4 ps

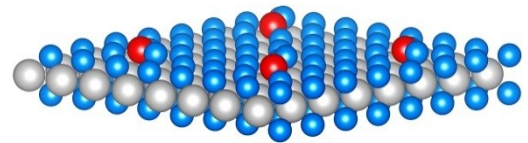

5 ps

(l) Br doped

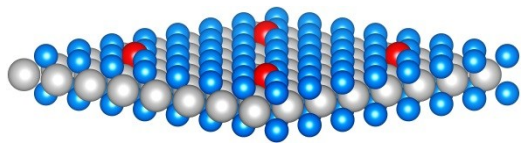

0 ps

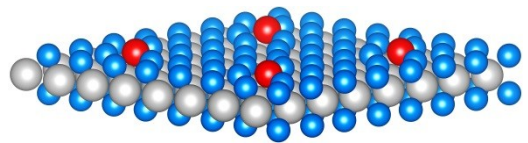

1 ps

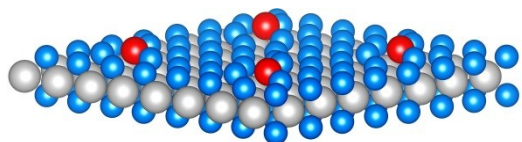

2 ps

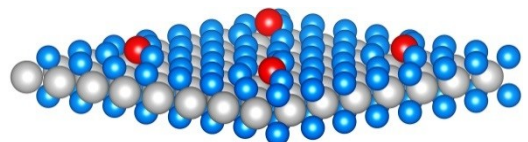

3 ps

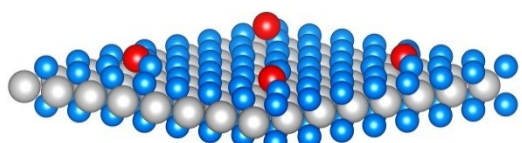

4 ps

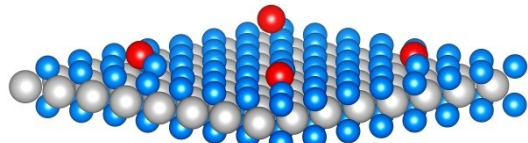

5 ps

(m) Te doped

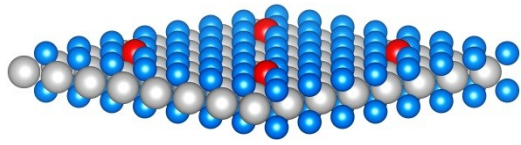

0 ps

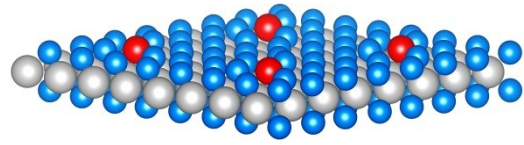

1 ps

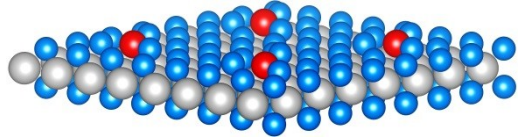

2 ps

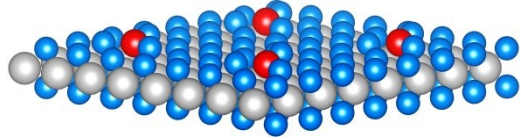

3 ps

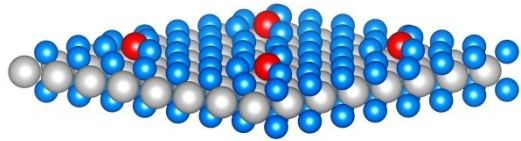

4 ps

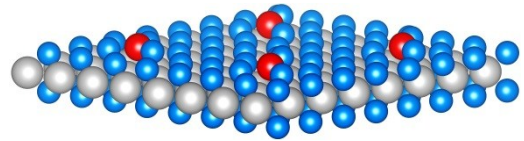

5 ps

(n) I doped

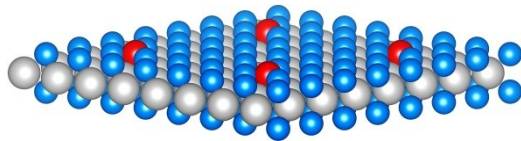

0 ps

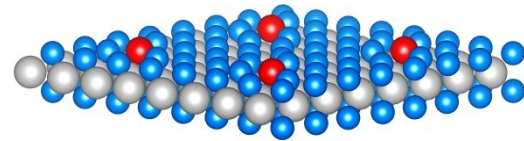

1 ps

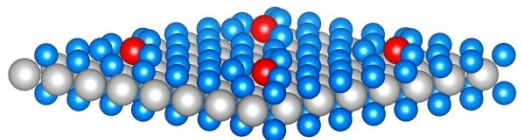

2 ps

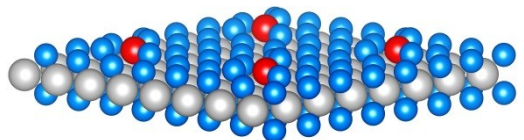

3 ps

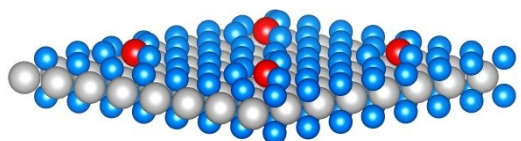

4 ps

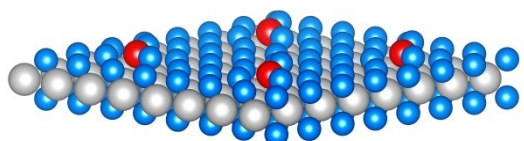

5 ps
